# Supplementary material
Source: HighWire-hosted journal article supplement (https://gut.bmj.com/content/gutjnl-2019-318264)
Supplement: inline-supplementary-material-3 [file inline-supplementary-material-3.pdf]

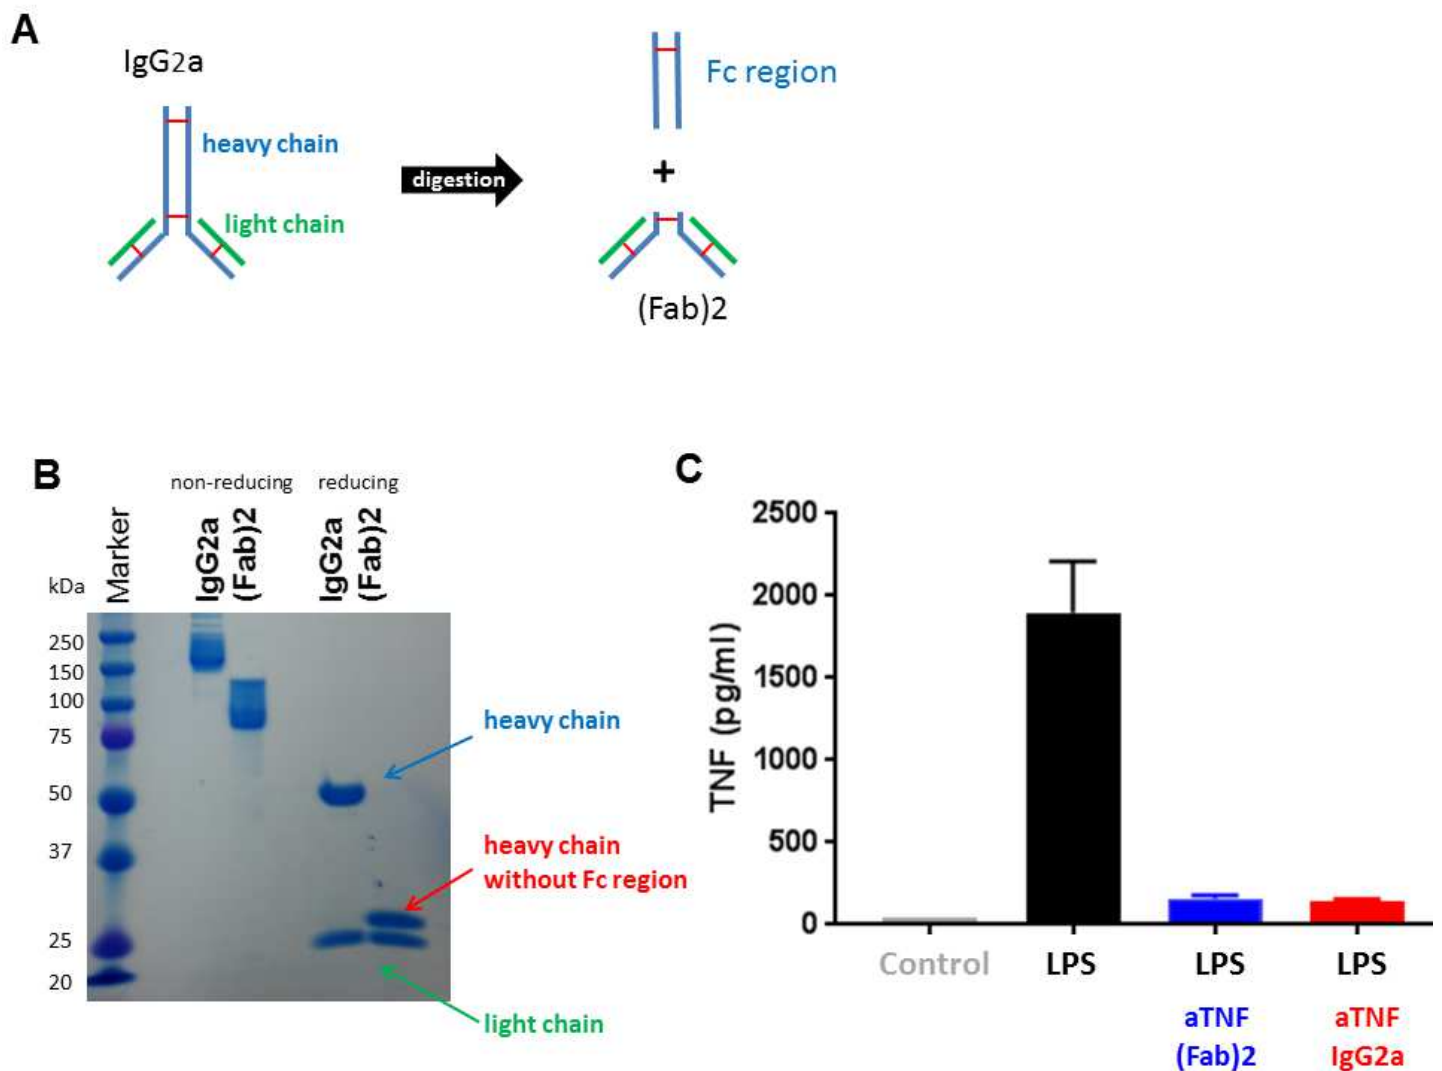

**Supplementary Figure S1: Anti-TNF Fab fragment generation and TNF neutralization (related to Figure 4)**

Anti-TNF Fab fragments were generated as shown in (A). Generation of the Fab fragment was confirmed by SDS gel electrophoresis under non-reducing and reducing conditions (B). TNF ELISA on medium of LPS stimulated BMDMs (C) shows that the Fab fragment was capable of neutralizing TNF similar to the anti-TNF mAb, when added in equimolar concentrations (7.2  $\mu\text{g/ml}$  vs 10  $\mu\text{g/ml}$ ).
