# Supplementary material
Source: HighWire-hosted journal article supplement (https://gut.bmj.com/content/gutjnl-2019-318264)
Supplement: inline-supplementary-material-6 [file inline-supplementary-material-6.pdf]

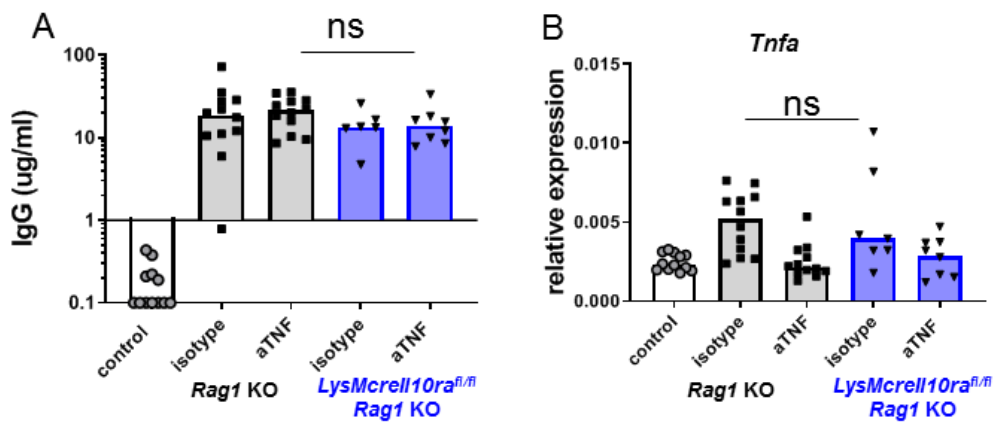

Supplementary Figure S4: Anti-TNF levels and intestinal TNF expression (related to Figure 6)

Total serum IgG levels in serum of *Rag1* KO and *LysMcrell10ra<sup>fl/fl</sup> Rag1* KO determined by ELISA reflecting circulating levels of therapeutic anti-TNF mAb or isotype control mAb (A). Intestinal *Tnfa* levels normalized for *Gapdh* expression, on whole colonic tissue mRNA, determined by qPCR (B). Significance was determined by Kruskal-Wallis followed by Dunn's post hoc test.
